# Supplementary material for: Autoimmune Limbic Encephalitis in Patients with Hematologic Malignancies after Haploidentical Hematopoietic Stem Cell Transplantation with Post-Transplant Cyclophosphamide
Source: MDPI journal article supplement (doi:10.3390/cells12162049), 2023-08-11
Supplement: s1 [file s1]

Figure S1.

A

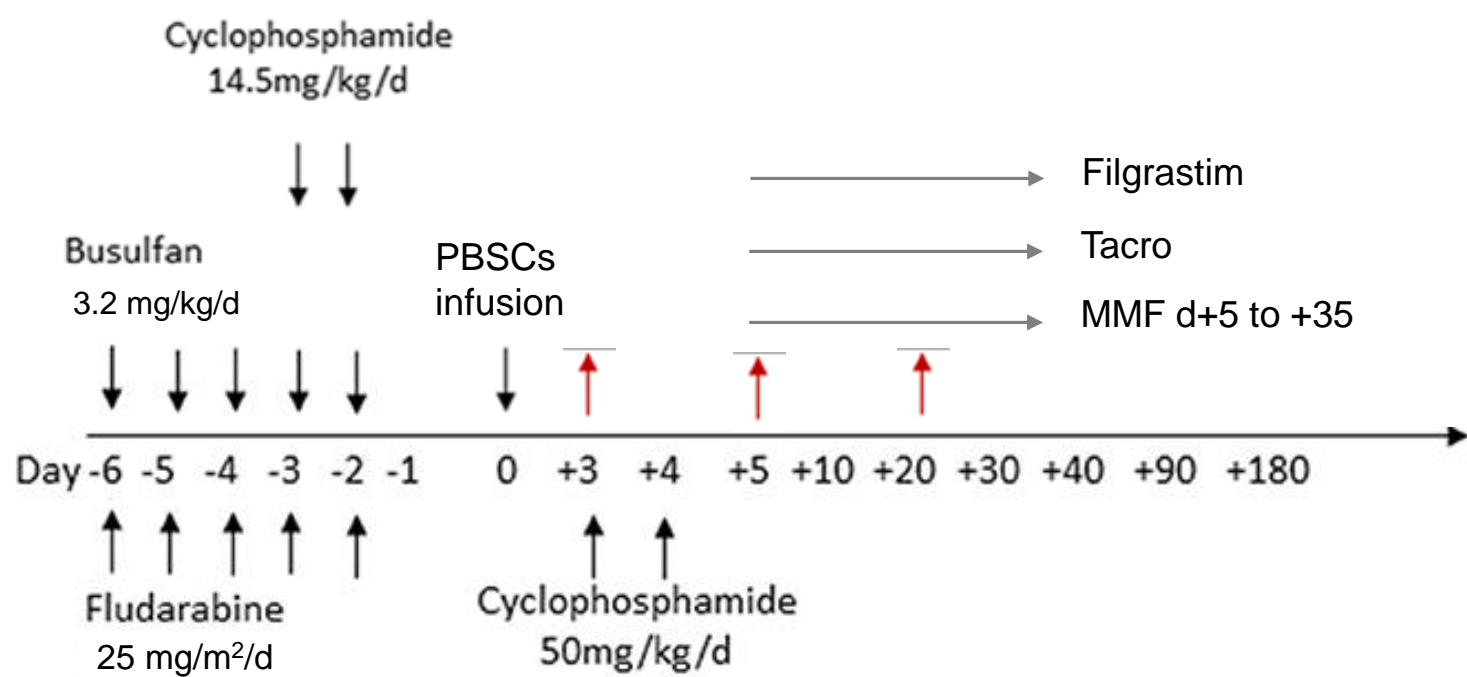

**Myeloablating conditioning (MAC) regimen**

B

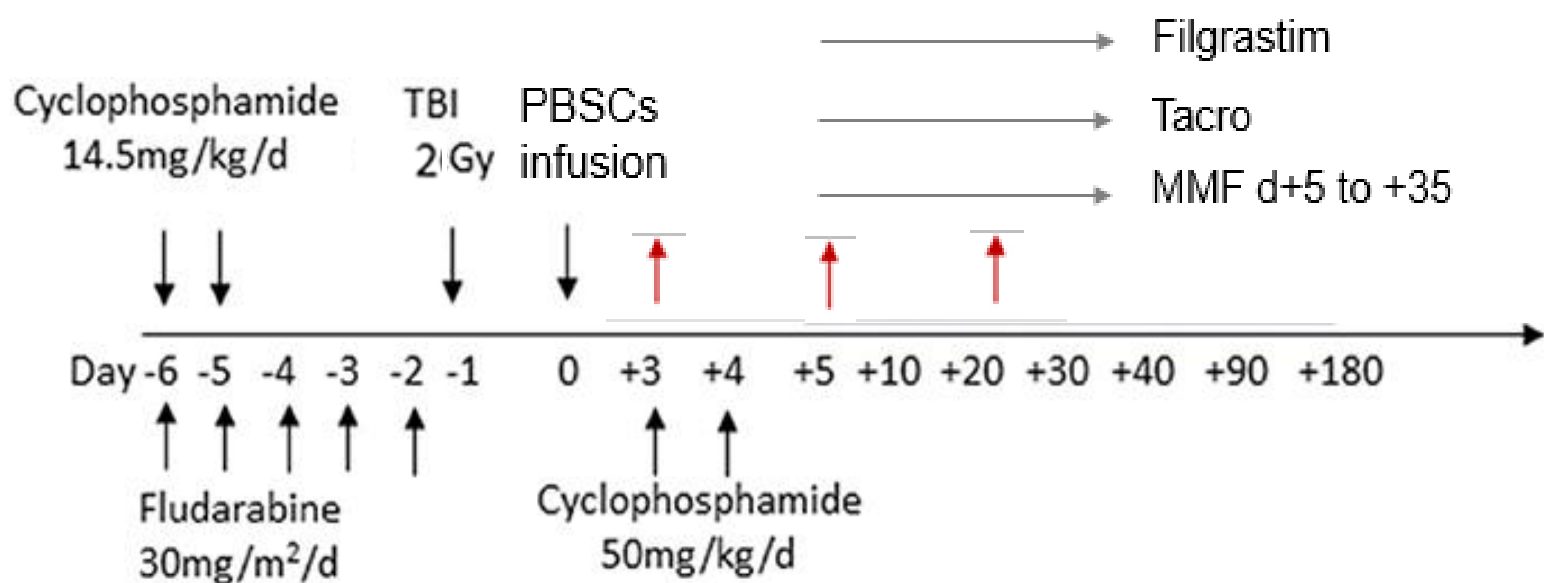

**Reduced intensity conditioning regimen**

**Figure S1. Study designs for haploidentical HSCT with PTCy.**

With PBSC infusion on day 0 and PTCy on post-transplant days 3 and 4, patients received either the (A) myeloablating conditioning regimen (N = 19) or (B) reduced intensity conditioning regimen in the week prior to transplant.

Figure S2.

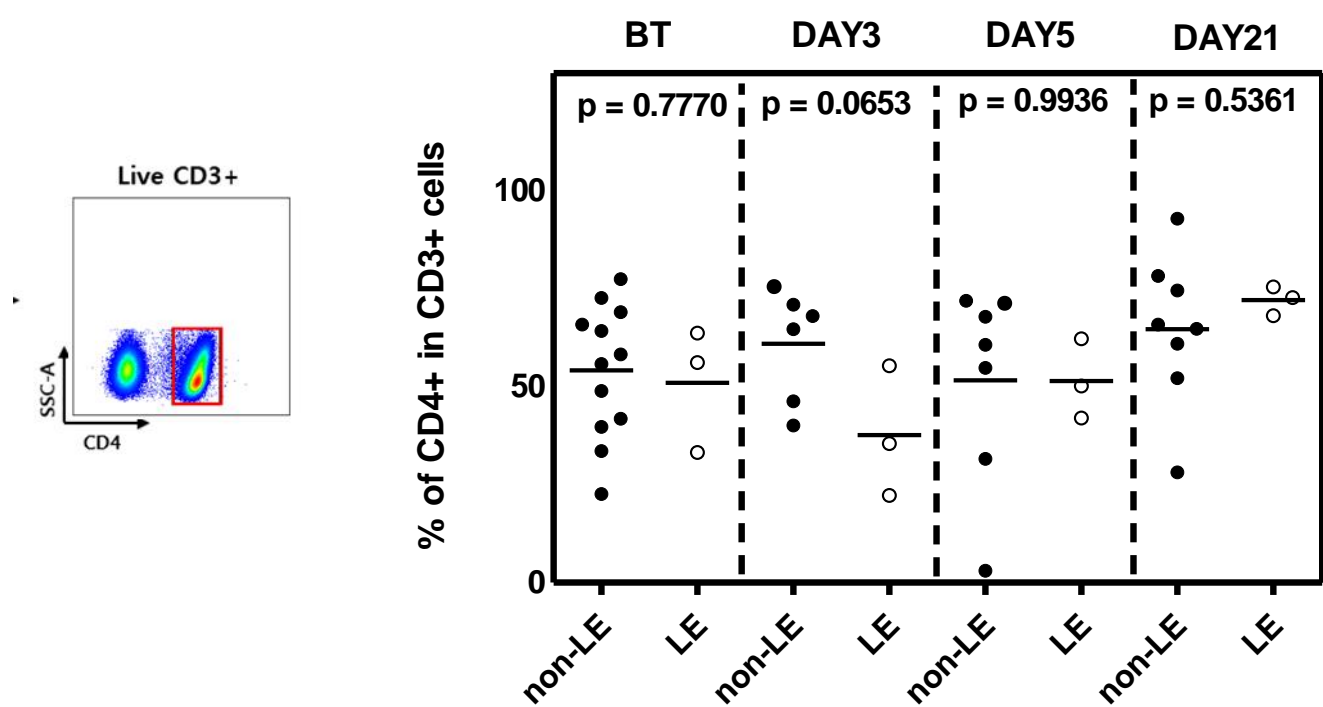

**Figure S2. Frequency of CD4+ T cells in LE vs non-LE patients.**  
(A) Flow cytometry gating strategy. (B) Statistical analysis before (BT) and on days 3, 5, and 21 post-HCST. Statistical difference by two tailed t-test.

Figure S3.

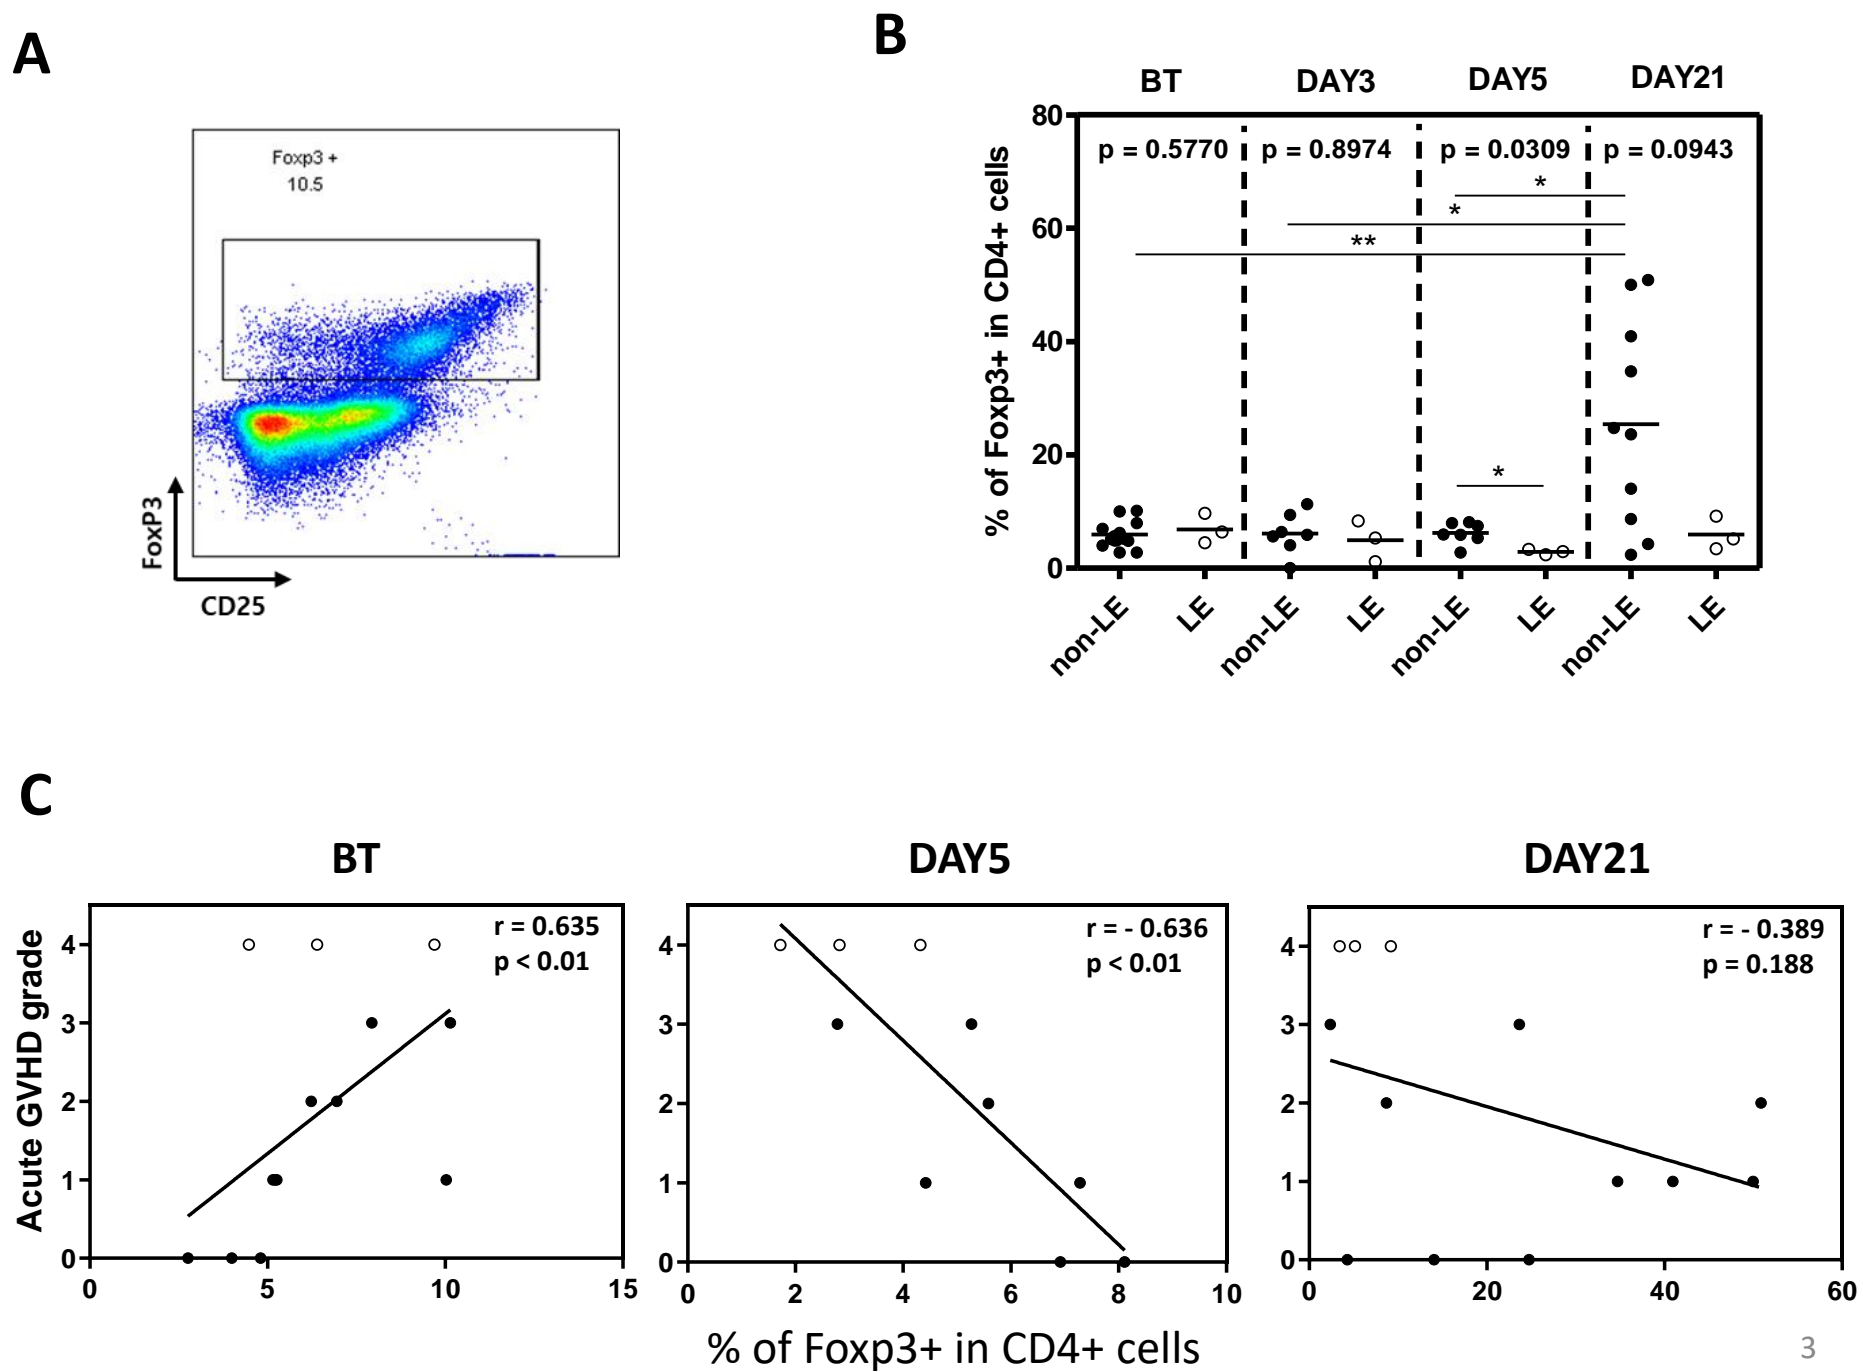

**Figure S3. Frequency of CD4+Foxp3+ T cells in LE vs non-LE patients.**  
(A) Flow cytometry gating strategy. (B) Statistical analysis before (BT) and on days 3, 5, and 21 post-HCST. Statistical difference by unpaired two tailed t-test. \* $p < 0.05$ , \*\* $p < 0.01$ , \*\*\* $p < 0.001$ . (C) Spearman correlation analysis with severity of acute GVHD at BT (left), post-HCST day 5 (mid), and post-HCST day 21 (right). The Spearman's correlation coefficient (r) and p value were indicated.

Figure S4.

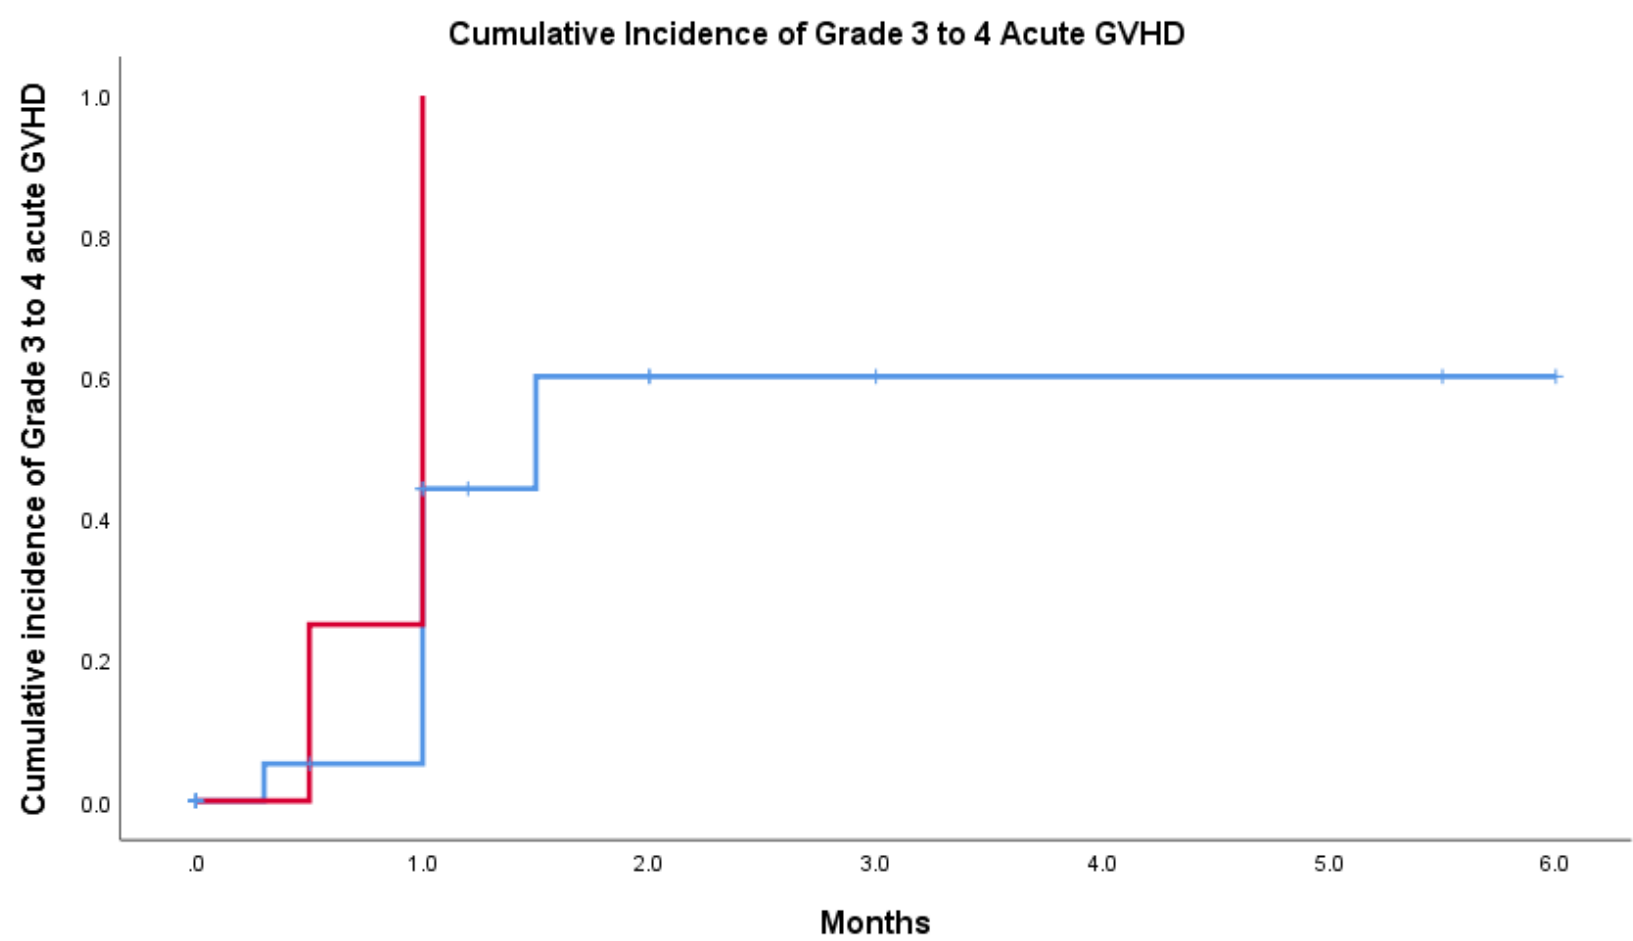

**Figure S4. Cumulative incidence of grade 3 to 4 acute GVHD in immune-related LE and non-LE patients.**

Comparison of cumulative incidence of severe (grade 3 to 4) acute GVHD between patients with (red) and without (blue) immune-related limbic encephalitis. Statistical difference by log-rank test (N=35, p=0.029)

Table S1.

Supplementary Table S1. Comparison of vasodilation and dyspnea between ALE and non-ALE patients

| Limbic encephalitis | Yes (N=4) | No (N=31) | P value <sup>§</sup> |
|---------------------|-----------|-----------|----------------------|
| Vasodilation        | 3 (75%)   | 3 (9.7%)  | 0.001                |
| Dyspnea             | 3 (75%)   | 8 (25.8%) | 0.046                |

§ $\chi^2$  test

Table S2.

Supplementary Table S2. Comparison of HLA types between ALE and non-ALE patients

| Limbic encephalitis  | Yes (N=4) | No (N=31)  | P value <sup>§</sup> |
|----------------------|-----------|------------|----------------------|
| A*0201 mismatched    | 2 (50%)   | 11 (35.5%) | 0.572                |
| B*4002 mismatched    | 2 (50%)   | 1 (3.2%)   | 0.002                |
| DRB1*0802 mismatched | 2 (50%)   | 1 (3.2%)   | 0.002                |

§ $\chi^2$  test

# Table S3.

Supplementary Table S3. Occurrence, organ manifestation and grading of acute GvHD for all patients (N=35)

| Patient's Number | Occurrence of acute GVHD | Involved Organ of acute GVHD (Grade of individual organ) | Overall Grade of acute GVHD | Immune-related Limbic Encephalitis |
|------------------|--------------------------|----------------------------------------------------------|-----------------------------|------------------------------------|
| 1                | No                       | No                                                       | 0                           | No                                 |
| 2                | Yes                      | Skin (4), Gut (4)                                        | 4                           | No                                 |
| 3                | Yes                      | Skin (4)                                                 | 3                           | No                                 |
| 4                | Yes                      | Skin (3)                                                 | 2                           | No                                 |
| 5                | Yes                      | Gut (3)                                                  | 3                           | No                                 |
| 6                | Yes                      | Skin (3)                                                 | 2                           | No                                 |
| 7                | No                       | No                                                       | 0                           | No                                 |
| 8                | Yes                      | Skin (1)                                                 | 1                           | No                                 |
| 9                | Yes                      | Gut (3)                                                  | 3                           | No                                 |
| 10               | Yes                      | Skin (2), Liver (1)                                      | 2                           | No                                 |
| 11               | Yes                      | Skin (2), Liver (3)                                      | 3                           | No                                 |
| 12               | No                       | No                                                       | 0                           | No                                 |
| 13               | No                       | No                                                       | 0                           | No                                 |
| 14               | No                       | No                                                       | 0                           | No                                 |
| 15               | Yes                      | Skin (4)                                                 | 3                           | No                                 |
| 16               | Yes                      | Skin (4)                                                 | 3                           | No                                 |
| 17               | Yes                      | Skin (4)                                                 | 3                           | No                                 |
| 18               | No                       | No                                                       | 0                           | No                                 |
| 19               | No                       | No                                                       | 0                           | No                                 |
| 20               | Yes                      | Skin (4)                                                 | 3                           | No                                 |
| 21               | Yes                      | Skin (3), Liver (3)                                      | 3                           | Yes                                |
| 22               | No                       | No                                                       | 0                           | No                                 |
| 23               | No                       | No                                                       | 0                           | No                                 |
| 24               | Yes                      | Gut (4)                                                  | 4                           | No                                 |
| 25               | No                       | No                                                       | 0                           | No                                 |
| 26               | Yes                      | Skin (4), Liver (4)                                      | 4                           | Yes                                |
| 27               | No                       | No                                                       | 0                           | No                                 |
| 28               | Yes                      | Skin (2)                                                 | 2                           | No                                 |
| 29               | Yes                      | Skin (2)                                                 | 2                           | No                                 |
| 30               | No                       | No                                                       | 0                           | No                                 |
| 31               | Yes                      | Skin (4), Liver (4)                                      | 4                           | Yes                                |
| 32               | No                       | No                                                       | 0                           | No                                 |
| 33               | No                       | No                                                       | 0                           | No                                 |
| 34               | Yes                      | Skin (4), Liver (4)                                      | 4                           | Yes                                |
| 35               | Yes                      | Skin (2)                                                 | 1                           | No                                 |
